# Supplementary material
Source: Elsevier journal article supplement (https://www.sciencedirect.com/science/article/pii/S0014256513002518)
Supplement: mmc1 [file S0014256513002518:mmc1.docx]

**Respuesta correcta b**. Endometriosis rectosigmoidea

Se produce por menstruación retrógrada a través de las trompas de Falopio, siendo característico la presencia de un implante peritoreal, un pedículo de conexión y la configuración en abanico de la lesión colónica por hipertrofia de la capa muscularis mucosa y retracción de la serosa. La existencia de rectorragias relacionadas con la menstruación en mujer fértil, ayudan al diagnóstico. Se le realizó sigmoidectomía y estudio histológico con inmunohistoquímica CK 7 que mostró la existencia de glándulas endometriales en dicha localización.
